# Supplementary material for: Highly porous activated carbon derived from the papaya plant (stems and leaves) for superior adsorption of alizarin red s and methylene blue dyes from wastewater
Source: Royal Society of Chemistry journal article supplement (doi:10.1039/d4ra07957d), 2025-01-01
Supplement: d4ra07957d1.pdf [file d4ra07957d1.pdf]

## Highly porous activated carbon derived from papaya plant (stems and leaves) for superior adsorption of alizarin red s and methylene blue dyes from water

Mona Moheb<sup>1</sup>, Ahmad M. El-Wakil<sup>1</sup>, and Fathi S. Awad<sup>1,2\*</sup>

<sup>1</sup>Chemistry Department, Faculty of Science, Mansoura University, Mansoura 35516, Egypt.

<sup>2</sup>Chemistry Department, Faculty of Science, New Mansoura University, New Mansoura 35712, Egypt.

### Supporting Information

**Table S1.** Properties of methylene blue and alizarin red s

| Dyes                  | Molecular formula    | Molecular structure                                                                 | Three-dimensional molecular structure                                               | $\lambda_{\max}$                               | Molecular weight (g/mol) | Type of dye  |
|-----------------------|----------------------|-------------------------------------------------------------------------------------|-------------------------------------------------------------------------------------|------------------------------------------------|--------------------------|--------------|
| <b>Methylene blue</b> | $C_{16}H_{18}ClN_3S$ | 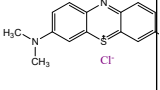  |   | 664nm                                          | 319.86 g/mol             | Cationic dye |
| <b>Alizarin red S</b> | $C_{14}H_7NaO_7S$    |  |  | 424nm (acidic medium)<br>520 nm (basic medium) | 342.26 g/mol             | anionic dye  |

**Table S2:** Surface characteristics of SAC and LAC.

| Sample                      | SAC                        | LAC                        |
|-----------------------------|----------------------------|----------------------------|
| BET surface area            | 1053.52 m <sup>2</sup> /g  | 441.671 m <sup>2</sup> /g  |
| BJH adsorption surface area | 266.186 m <sup>2</sup> /g  | 143.413 m <sup>2</sup> /g  |
| Pore volume                 | 0.785116 cc/g              | 0.338432 cc/g              |
| Pore radius                 | 1.92765 nm                 | 1.9282 nm                  |
| DFT adsorption surface area | 923.3446 m <sup>2</sup> /g | 352.5197 m <sup>2</sup> /g |
| Pore Volume                 | 1.1580 cc/g                | 0.4858 cc/g                |

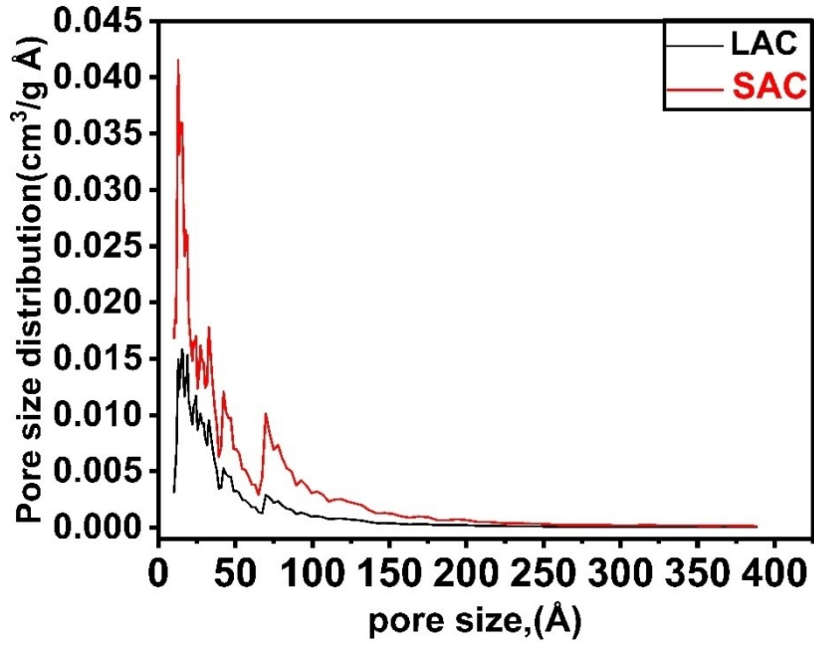

Figure S1. Pore size distribution of SAC and LAC

Results

|                                    | Mean (mV)     | Area (%) | St Dev (mV) |
|------------------------------------|---------------|----------|-------------|
| <b>Zeta Potential (mV): -10.4</b>  | Peak 1: -10.4 | 100.0    | 5.72        |
| <b>Zeta Deviation (mV): 5.72</b>   | Peak 2: 0.00  | 0.0      | 0.00        |
| <b>Conductivity (mS/cm): 0.110</b> | Peak 3: 0.00  | 0.0      | 0.00        |
| <b>Result quality : Good</b>       |               |          |             |

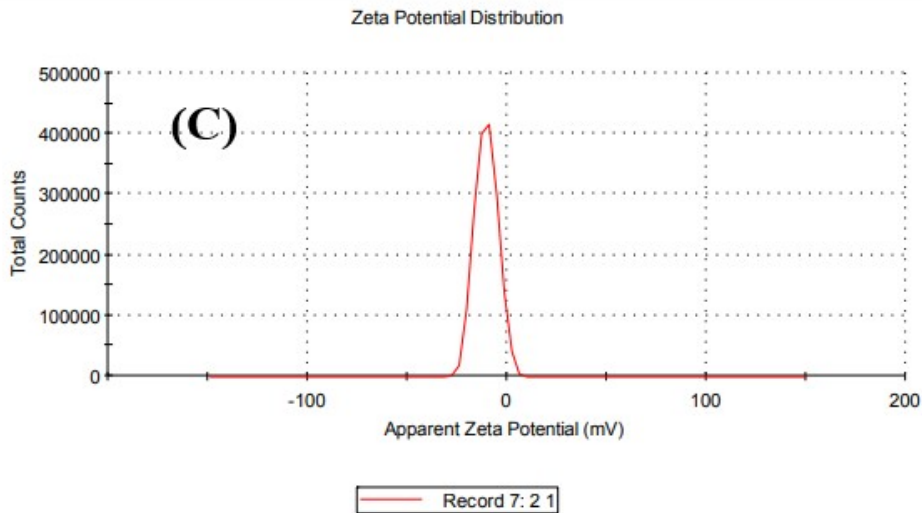

Figure S2. Zeta potential of SAC.

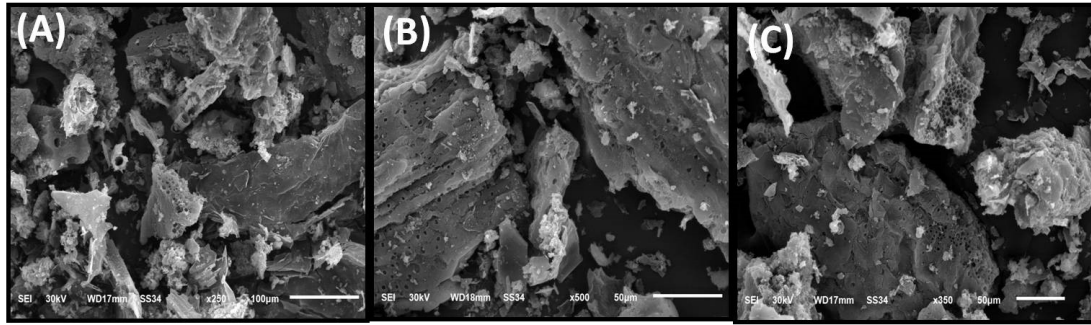

Figure S3: SEM images of SAC (A-C).

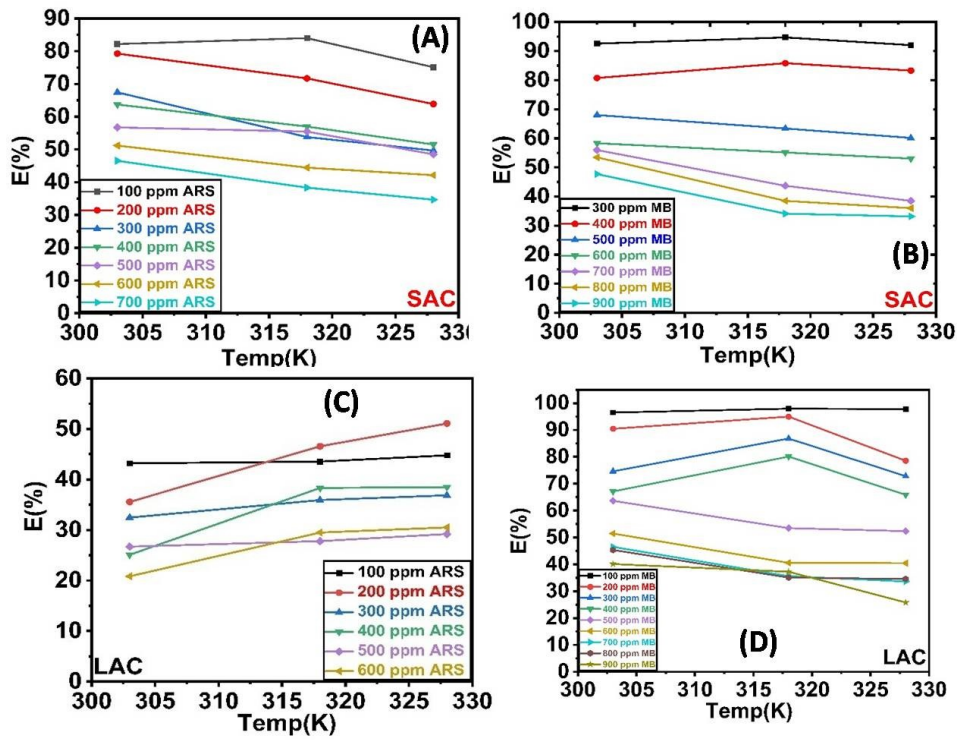

Figure S4: Effect of temperature on the removal of MB and ARS dyes using LAC and SAC.

S1:

The PFO model usually predicts the behavior at the initial stage of the adsorption process, while PSO model predicts the behavior at all stages of the adsorption process[1].

Pseudo-first-order kinetic model:

$$\log(q_e - q_t) = \log q_e - \frac{K_1 t}{2.303} \quad (1)$$

Pseudo-second-order kinetic model:

$$\frac{t}{q_t} = \frac{1}{K_2 q_e^2} + \frac{t}{q_e} \quad (2)$$

Where  $k_1$  ( $\text{min}^{-1}$ ) and  $k_2$  ( $\text{g mol}^{-1} \text{min}^{-1}$ ) are the rate constants.  $q_t$  and  $q_e$  are the adsorption uptake of heavy metal at time  $t$  (min) and at equilibrium. Where  $k_1$  ( $\text{min}^{-1}$ ) and  $k_2$  ( $\text{g mol}^{-1} \text{min}^{-1}$ ) are the rate constants.  $q_t$  and  $q_e$  are the adsorption uptake of heavy metal at time  $t$  (min) and at equilibrium.

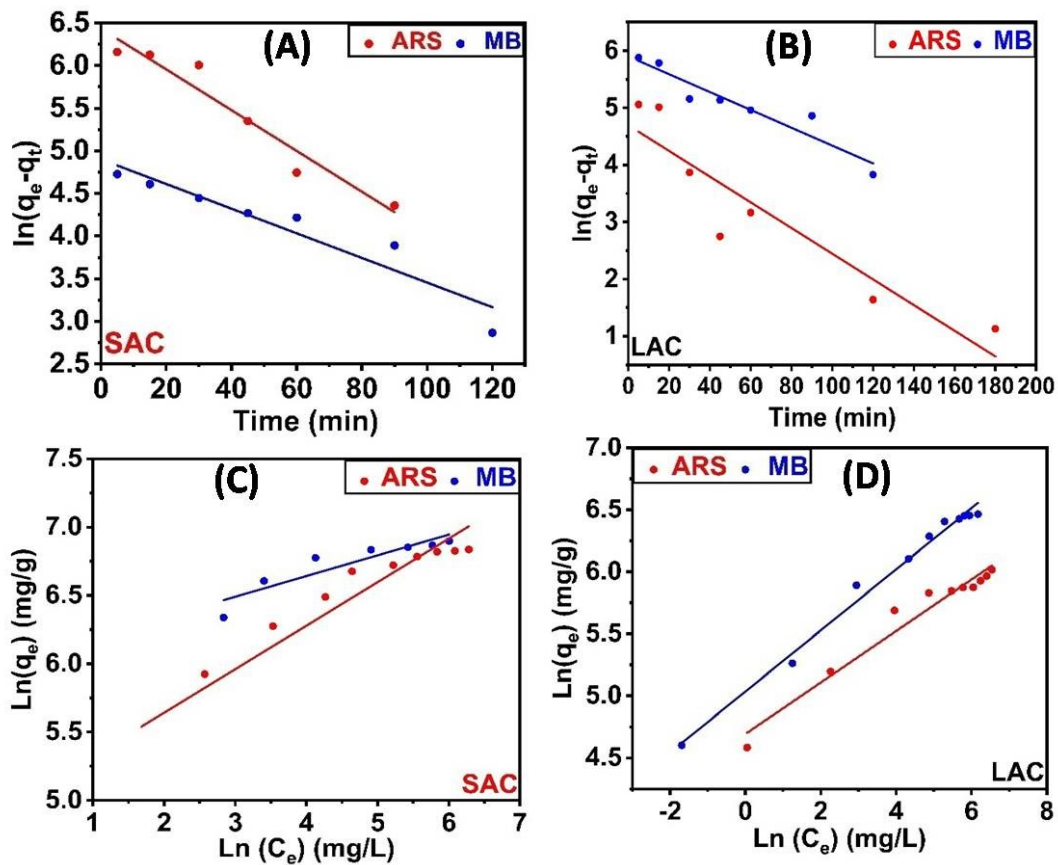

**Figure S5:** PFO kinetic models for the adsorption of MB and ARS onto SAC (A) and LAC (B); Freundlich isotherm model for the adsorption of MB and ARS onto SAC (C) and LAC (D).

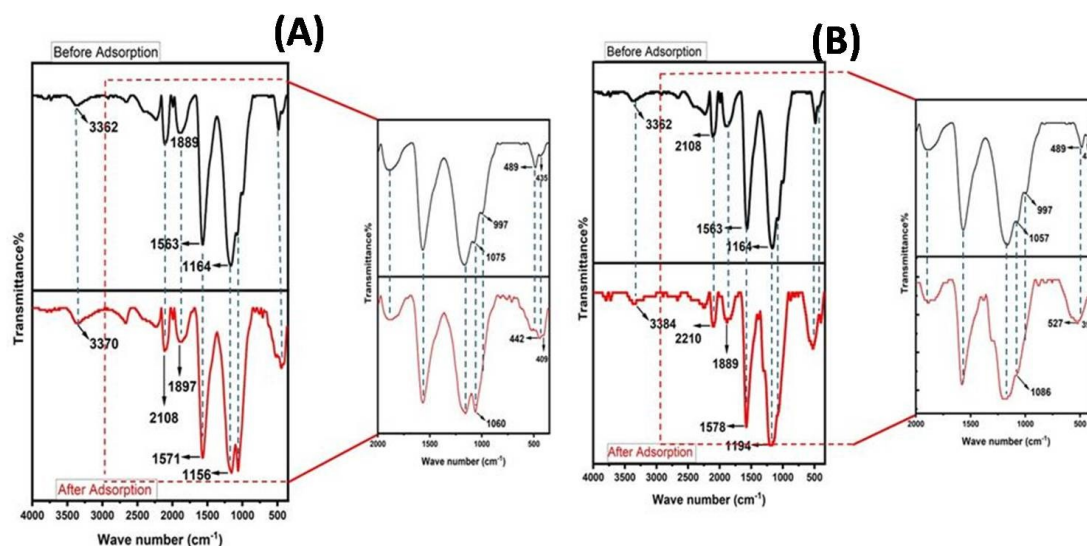

**Figure S6:** FTIR spectra of SAC Before and after MB adsorption (A) and ARS adsorption.

## References

- [1] A.M. El-Wakil, S.M. Waly, W.M. Abou El-Maaty, M.M. Waly, M. Yilmaz, F.S. Awad, Triazine-Based Functionalized Activated Carbon Prepared from Water Hyacinth for the Removal of Hg<sup>2+</sup>, Pb<sup>2+</sup>, and Cd<sup>2+</sup> Ions from Water, ACS omega 7(7) (2022) 6058-6069.
